# Supplementary material
Source: PubMed Central journal article supplement (PMC5549011)

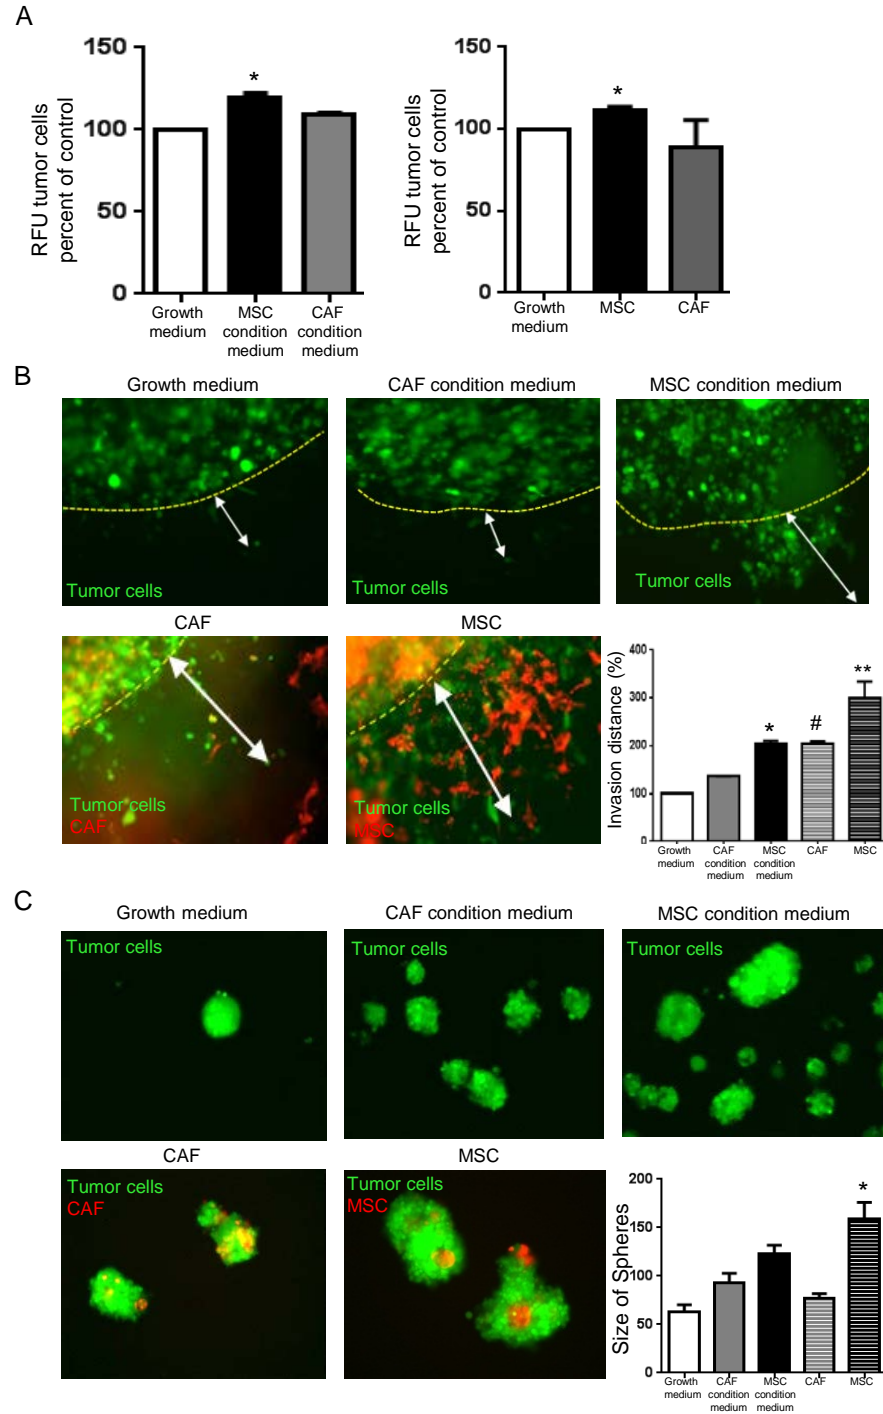

## Cytokine array data

|                 |           |                  |
|-----------------|-----------|------------------|
| C5a             | IL-4      | IL-32 alpha      |
| CD40 ligand     | IL-5      | CXCL10/IP-10     |
| G-CSF           | IL-6      | CXCL11/I-TAC     |
| GM-CSF          | IL-8      | CCL2/MCP-1       |
| CXCL1/GRO alpha | IL-10     | MIF              |
| CCL1/I-309      | IL-12 p70 | CCL3/MIP-1 alpha |
| ICAM-1          | IL-13     | CCL4/MIP-1 beta  |
| IFN-gamma       | IL-16     | CCL5/RANTES      |
| IL-1 alpha      | IL-17     | CXCL12/SDF-1     |
| IL-1 beta       | IL-17E    | Serpin E1/PAI-1  |
| IL-1ra          | IL-23     | TNF-alpha        |
| IL-2            | IL-27     | TREM-1           |

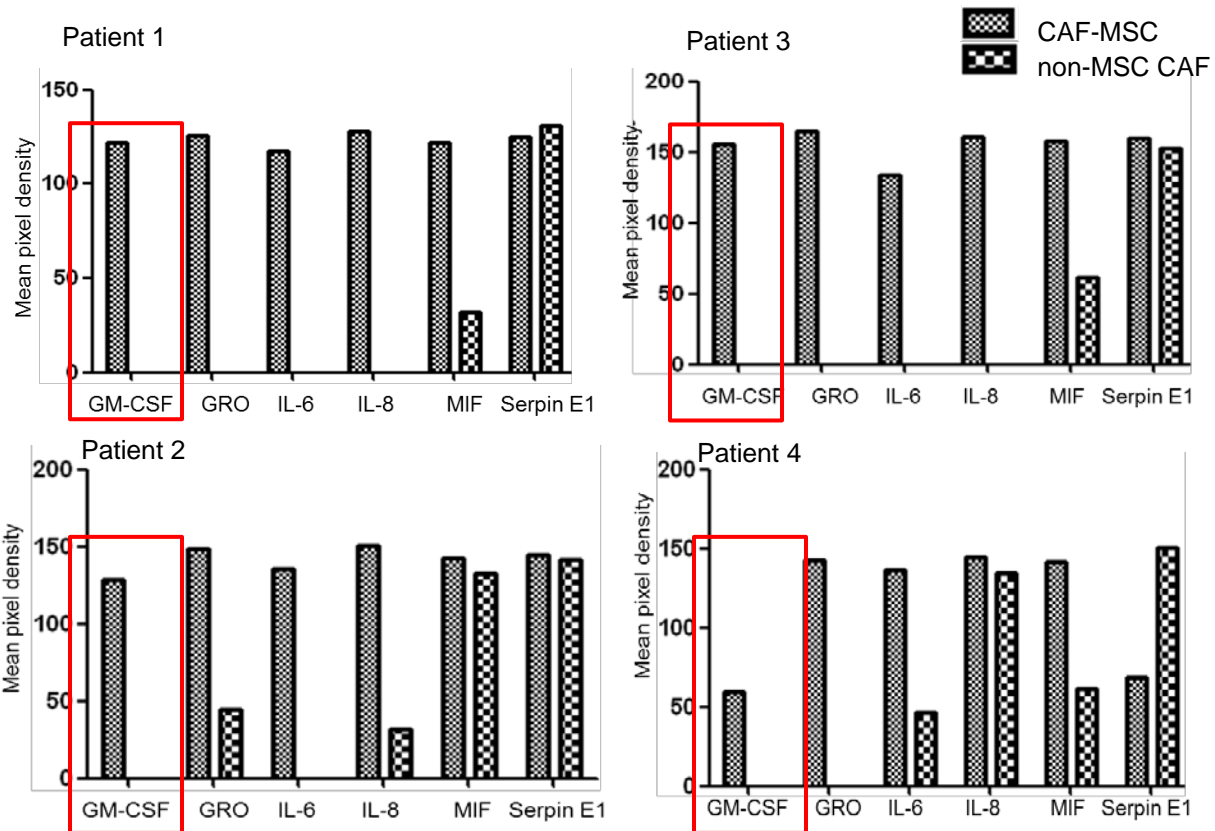

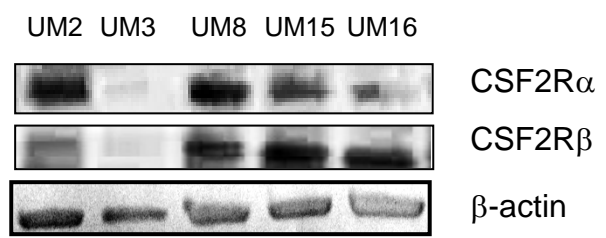

Supplement: NIHMS868452-supplement-Supplemental_Figures.pdf [file NIHMS868452-supplement-Supplemental_Figures.pdf]
